# Supplementary material
Source: PubMed Central journal article supplement (PMC6222106)
Supplement: supp_RA118.003608_137634_1_supp_198945_pjjj2t.pdf [file supp_RA118.003608_137634_1_supp_198945_pjjj2t.pdf]

## Supplemental Tables

Table 1 List of partial VGLL4 MS candidates

| Gene names | Protein names                                   | Peptides<br>vgll4 | Peptides<br>IGG | Unique<br>peptides<br>vgll4 | Unique<br>peptides<br>IGG | Unique sequence<br>coverage [%] | Mol.<br>weight<br>[kDa] | Sequence<br>length |
|------------|-------------------------------------------------|-------------------|-----------------|-----------------------------|---------------------------|---------------------------------|-------------------------|--------------------|
| VGLL4      | Transcription cofactor vestigial-like protein 4 | 19                | 6               | 14                          | 6                         | 60.5                            | 31.864                  | 296                |
| CTBP2      | C-terminal-binding protein 2                    | 5                 | 0               | 3                           | 0                         | 9.7                             | 56.101                  | 513                |
| CTBP1      | C-terminal-binding protein 1                    | 4                 | 0               | 2                           | 0                         | 6.8                             | 47.535                  | 440                |
| SLC25A5    | ADP/ATP translocase 2                           | 14                | 4               | 5                           | 1                         | 14.9                            | 35.293                  | 323                |
| YWHAQ      | 14-3-3 protein theta                            | 12                | 2               | 9                           | 1                         | 39.2                            | 27.764                  | 245                |
| DNAJA1     | DnaJ homolog subfamily A member 1               | 11                | 1               | 11                          | 1                         | 41.1                            | 44.868                  | 397                |
| TUBB4B     | Tubulin beta-4B chain                           | 18                | 8               | 1                           | 1                         | 2.7                             | 49.83                   | 445                |
| HSP90AB1   | Heat shock protein HSP 90-beta                  | 14                | 5               | 10                          | 3                         | 17.1                            | 83.263                  | 724                |
| PKM2       | Pyruvate kinase isozymes M1/M2;Pyruvate kinase  | 9                 | 0               | 9                           | 0                         | 28.2                            | 57.936                  | 531                |
| DNAJC7     | DnaJ homolog subfamily C member 7               | 9                 | 0               | 9                           | 0                         | 27.1                            | 56.44                   | 494                |
| STUB1      | E3 ubiquitin-protein ligase CHIP                | 9                 | 0               | 9                           | 0                         | 33                              | 34.856                  | 303                |

Table 2 List of all used shRNA sequences

| Gene       | Direction | Sequence                                                      |
|------------|-----------|---------------------------------------------------------------|
| shmTEAD4-1 | sense     | CCGGGTGAAACACTTACCCGAGAAGCTCGAGTTCTCGGGTAAGTGTTCAGCTTTTGTG    |
|            | antisense | AATTCAAAAAGCTGAAACACTTACCCGAGAAGCTCGAGTTCTCGGGTAAGTGTTCAGC    |
| shmTEAD4-2 | sense     | CCGGCCGCAAATCTATGACAAGTTCTCGAGAAGTTGTCATAGATTTGGCGGTTTTTG     |
|            | antisense | AATTCAAAAACCGCAAATCTATGACAAGTTCTCGAGAAGTTGTCATAGATTTGGCGG     |
| shmVGLL4-1 | sense     | CCGGACACATGGCTTCAGATCAAAGCTCGAGCTTTGATCTGAAGCCATGTGTTTTTGTG   |
|            | antisense | AATTCAAAAACACATGGCTTCAGATCAAAGCTCGAGCTTTGATCTGAAGCCATGTGT     |
| shmVGLL4-2 | sense     | CCGGGACAAGATGAACAACAATATCCTCGAGGATATTGTTGTTTCATCTTGTCTTTTGTG  |
|            | antisense | AATTCAAAAAGACAAGATGAACAACAATATCCTCGAGGATATTGTTGTTTCATCTTGTCT  |
| shmYAP-1   | sense     | CCGGTGAGAACAATGACAACCAATACTCGAGTATTGGTTGTCATTGTTCTCATTTTTTGTG |
|            | antisense | AATTCAAAAATGAGAACAATGACAACCAATACTCGAGTATTGGTTGTCATTGTTCTCA    |
| shmYAP-2   | sense     | CCGGGAAGCGCTGAGTTCGAAATCCTCGAGGATTTCCGAACTCAGCGCTTCTTTTTGTG   |
|            | antisense | AATTCAAAAAGAAGCGCTGAGTTCGAAATCCTCGAGGATTTCCGAACTCAGCGCTTC     |
| shmCtBP2   | sense     | CCGGTACGAACTGTGTCAACAAAGCTCGAGCTTTGTTGACACAGTTTCGATTTTTTGTG   |
|            | antisense | AATTCAAAAATACGAACTGTGTCAACAAAGCTCGAGCTTTGTTGACACAGTTTCGTA     |

Table 3 List of the primers used for CHIP-PCR

| Primer   | Direction | Sequence                        | Length (bp) |
|----------|-----------|---------------------------------|-------------|
| PPARG-E  | forward   | 5' -CAATATTGAACAATCTCTGCTCTG-3' | 113         |
|          | reverse   | 5' -ACAAGGAAAACGTTGCTACATT-3'   |             |
| PPARG-A  | forward   | 5' -TCCCAGATGGTTCCCTGAGCA-3'    | 116         |
|          | reverse   | 5' -GGAGTGTAAGATGAGAAATGG-3'    |             |
| KLF8     | forward   | 5' -AAATTCCTGCACTACAAGACTCT-3'  | 173         |
|          | reverse   | 5' -TCCCCTAGAAGTGCAGTTACAGAC-3' |             |
| Adipo2-3 | forward   | 5' -GATTGGGTACCTCACTCAG-3'      | 152         |
|          | reverse   | 5' -CCAGATGCCCCCAACAG-3'        |             |
| PLINB    | forward   | 5' -AGAGACAGTGTGGGAGGGTGGAG-3'  | 104         |
|          | reverse   | 5' -GAGAGGGTTAGCTGAGGAGAAAGA-3' |             |
| CTGF     | forward   | 5' -TGTGCCAGCTTTTTCAGACG-3'     |             |
|          | reverse   | 5' -GAACTGAATGGAGTCCTACACA-3'   |             |

## Supplemental Figures

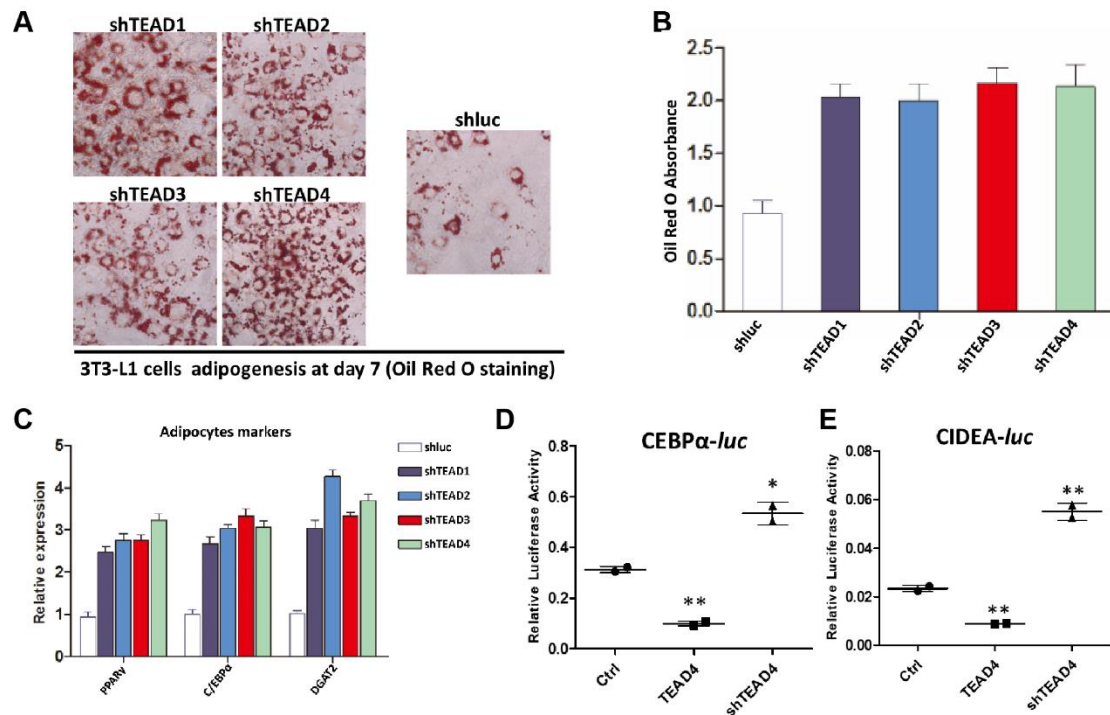

**Supplemental Figure 1. Default repression of adipogenesis by TEADs in 3T3-L1 cells.**

(A and B) Oil Red O staining of lentiviral-mediated knock-down of TEAD1, 2, 3, 4 3T3-L1 stable cells after adipogenic cocktails induced for 7 days (A), and quantified by measurement of the absorbance at 510 nm (B). Data were shown as mean  $\pm$  SD ( $n=3$ ). \*,  $p<0.05$  by Student's t test.

(C) qRT-PCR analysis of adipocytes markers expression in TEADs knock-down 3T3-L1 cells after adipogenic cocktails induced for 7 days.

(D and E) Overexpression or knock-down of TEAD4 effect on C/EBP $\alpha$ -Luc (C), and CIDEA-luc (D) activity in 293T cells. Data were shown as mean  $\pm$  SD ( $n=3$ ). \*\*,  $p<0.01$  by Student's t test. \*,  $p<0.05$  by Student's t test.

**A**

**3T3-L1 cells adipogenesis at day 7**

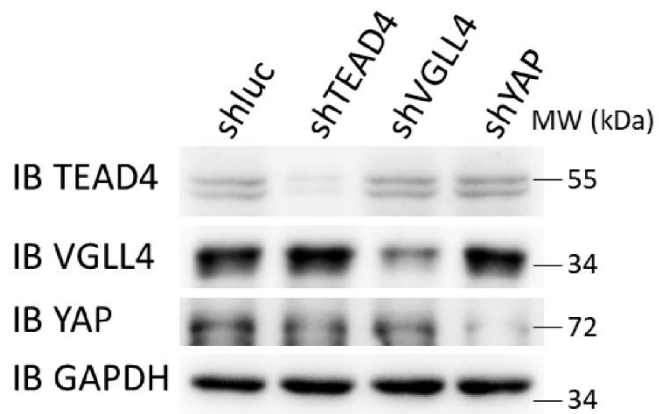

**Supplemental Figure 2. TEAD4 modulates adipogenesis-related pathways.**

(A) Immunoblot analysis of TEAD4, VGLL4 and YAP in lentiviral-mediated expression of shluc/shTEAD4/shVGLL4/shYAP 3T3-L1 stable cell lines after adipogenic cocktails induced for 7 days. GAPDH was used as an internal control. Positions of protein molecular mass marker are indicated on the right.

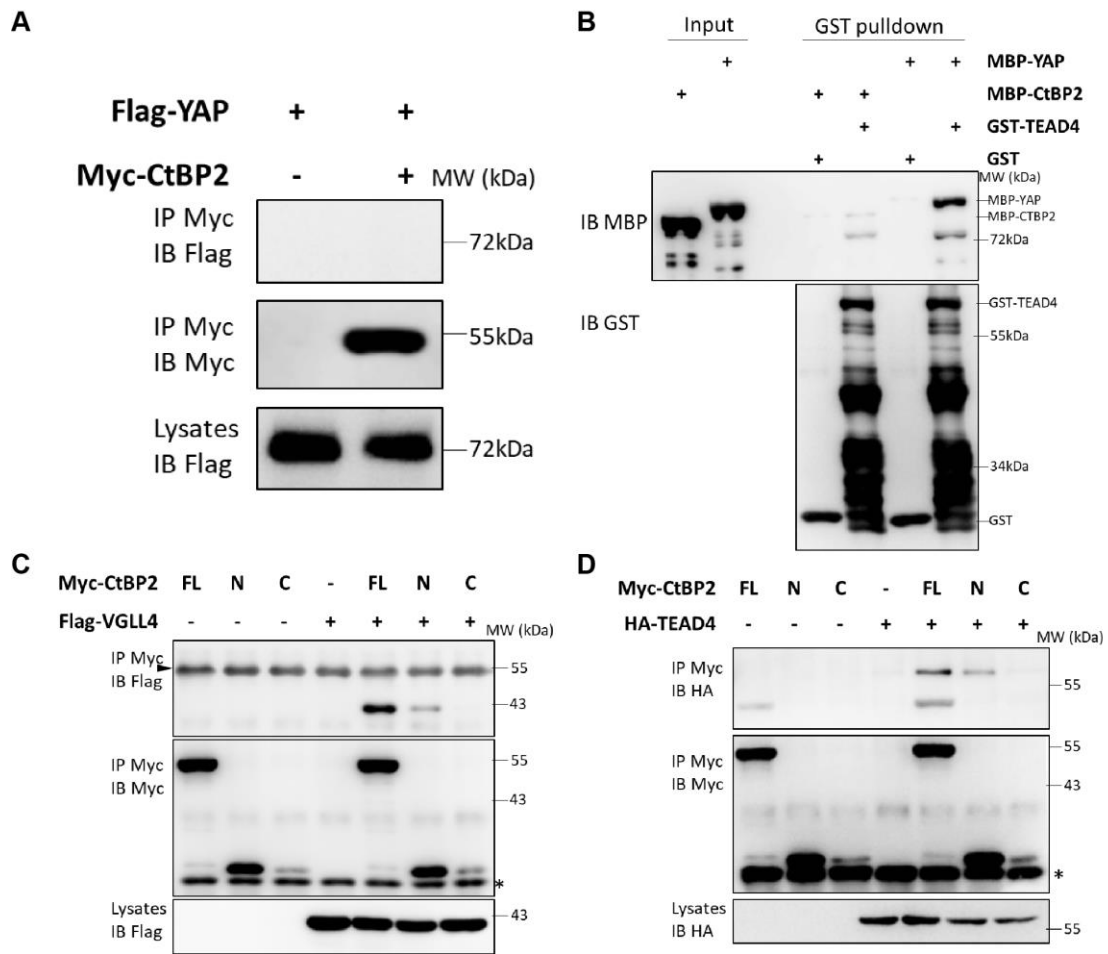

**Supplemental Figure 3. CtBP2 binds to both TEAD4 and VGLL4.**

(A) Co-IP assay detected no interaction between YAP and CtBP2. The indicated plasmids were transfected into 293T cells and analyzed by Co-IP.

(B) GST pull-down assay to detect the interaction between TEAD4 and CtBP2, using YAP as a positive control.

(C and D) Co-IP assay to map the interaction between CtBP2 and VGLL4 (C), and TEAD4 (D), respectively. The plasmids of CtBP2 full-length (FL), CtBP2 N-terminal, CtBP2 C-terminal, VGLL4 and TEAD4 were transfected into 293T cells and analyzed by Co-IP. The arrowhead indicates the IgG heavy chain and the asterisk denotes the nonspecific band.

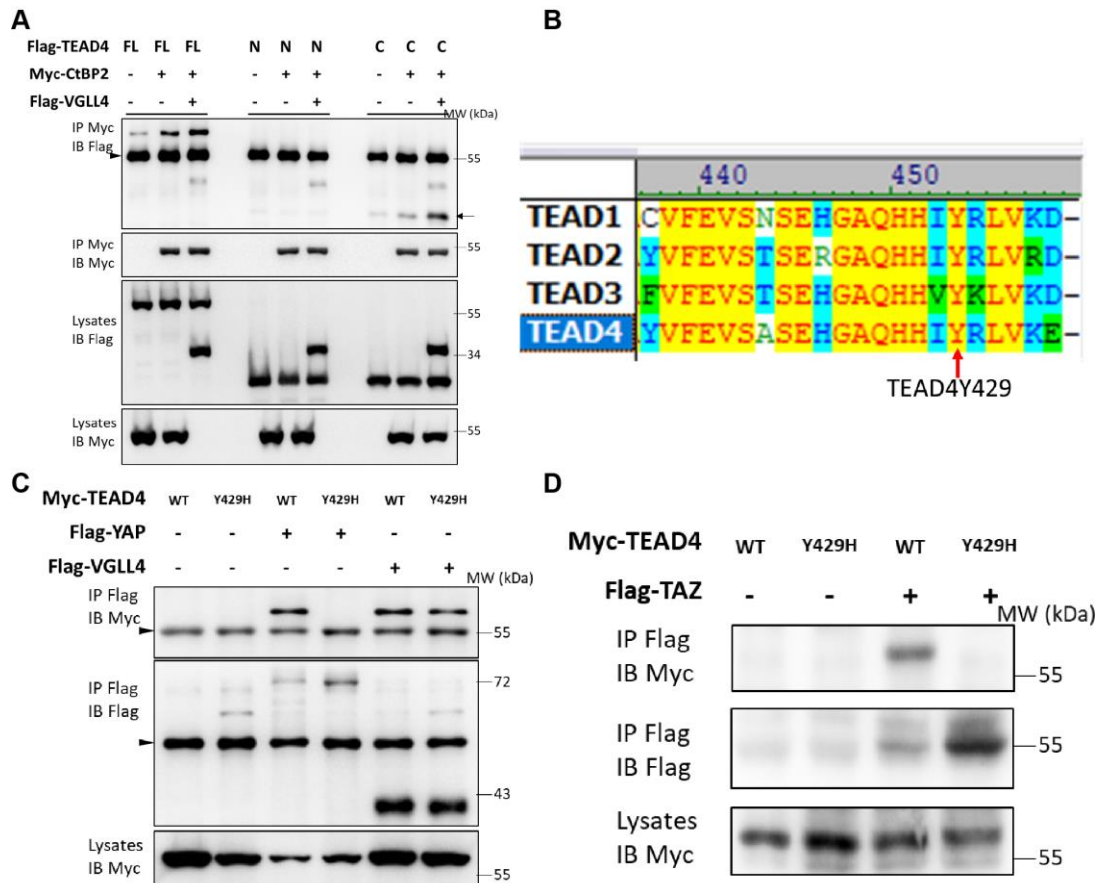

**Supplemental Figure 4. VGLL4 mediates the interaction between TEAD4 and CtBP2.**

(A) Co-IP assay to detect exogenous VGLL4 effect on the interaction between TEAD4 full-length, TEAD4 N-terminal or TEAD4 C-terminal and CtBP2. The indicated plasmids were transfected into 293T cells and analyzed by Co-IP. The arrowhead indicates the IgG heavy chain.

(B) Sequence alignment of TEADs YAP interactions.

(C) Co-IP assay to detect TEAD4Y429 site function on its interaction with YAP or VGLL4, respectively. The indicated plasmids were transfected into 293T cells and analyzed by Co-IP. The arrowheads indicates the IgG heavy chains.

(D) Co-IP assay to detect TEAD4Y429 site function on its interaction with TAZ. The indicated plasmids were transfected into 293T cells and analyzed by Co-IP.

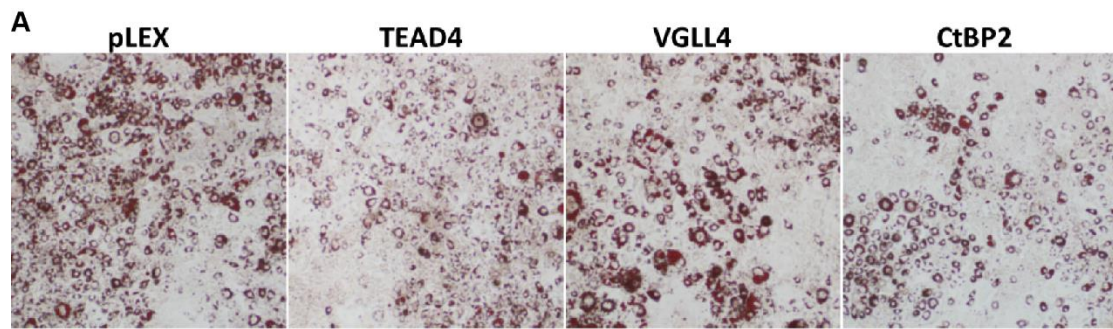

3T3-L1 cells adipogenesis at day 7 (Oil Red O staining)

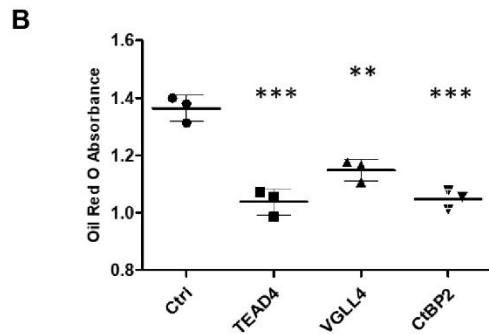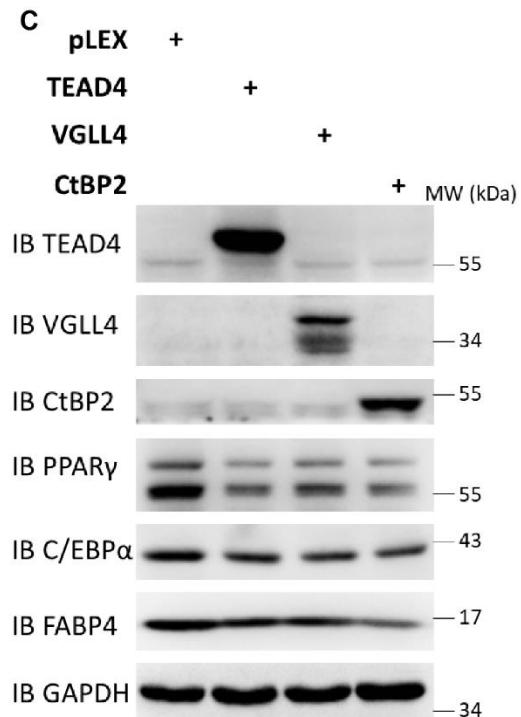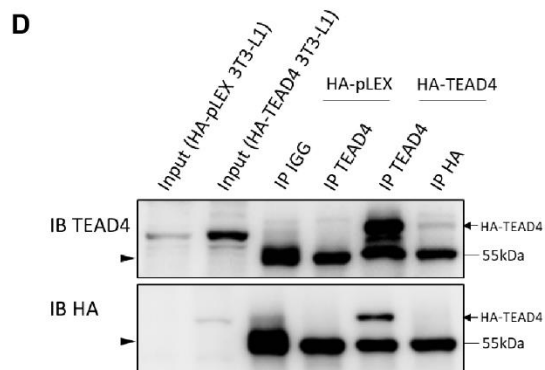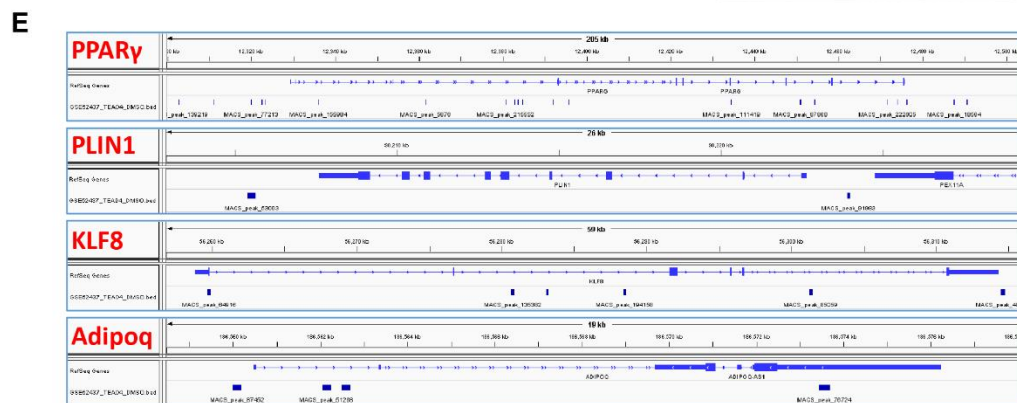

**Supplemental Figure 5. TEAD4 directly regulates adipogenesis and targets PPAR $\gamma$ , PLIN1, KLF8 and Adipoq.**

(A and B) Oil Red O staining of lentiviral-mediated overexpression of pLEX, TEAD4,

VGLL4 and CtBP2 3T3-L1 stable cell lines after adipogenic cocktails induced for 7 days

(A) and quantified by measurement of the absorbance at 510 nm (B).

(C) Immunoblot analysis of TEAD4, VGLL4, CtBP2, PPAR $\gamma$ , C/EBP $\alpha$  and FABP4 expression in the above cell samples. GAPDH was used as an internal control. Positions of protein molecular mass marker are indicated on the right.

(D) Co-IP assay to verify TEAD4 antibody immunoprecipitation efficiency in 3T3-L1 cells. TEAD4 or IgG antibodies were incubated with cell lysates stable-expressing TEAD4 and analyzed by Co-IP. The arrowheads indicate the IgG heavy chains.

(E) Positive binding peaks of TEAD4 in PPAR $\gamma$ , PLIN1, KLF8 and Adipoq promoter regions.

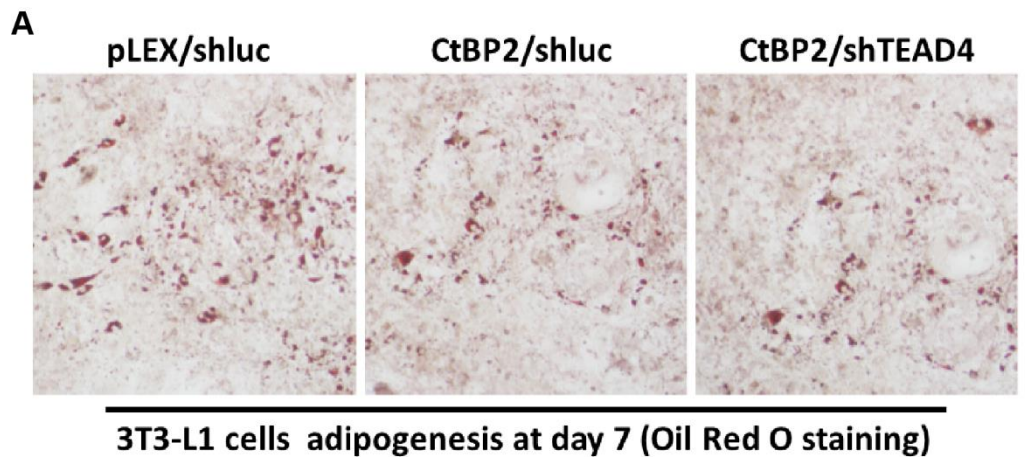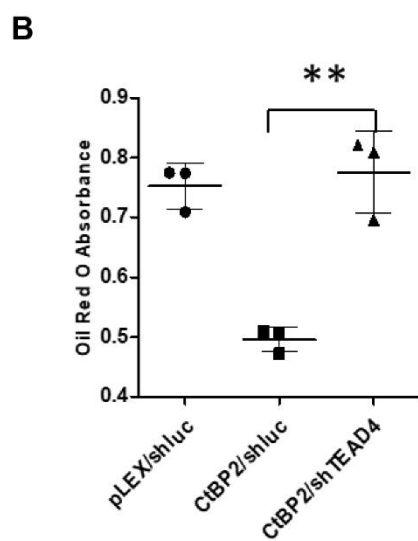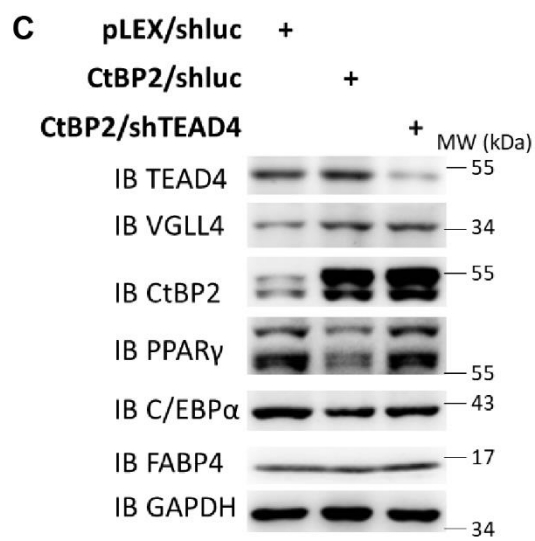

**Supplemental Figure 6. Ectopic expression of CtBP2 in the depletion of TEAD4 inhibits adipogenesis.**

(A and B) Oil Red O staining of lentiviral-mediated overexpression of CtBP2 in TEAD4-depletion 3T3-L1 stable cell lines after adipogenic cocktails induced for 7 days (A) and quantified by measurement of the absorbance at 510 nm (B). \*\*,  $p < 0.01$  by Student's t test.

(C) Immunoblot analysis of TEAD4, VGLL4, CtBP2, PPAR $\gamma$ , C/EBP $\alpha$  and FABP4 expression in the above cell samples. GAPDH was used as an internal control. Positions of protein molecular mass marker are indicated on the right.
